# Supplementary material for: High-Throughput Library Transgenesis in Caenorhabditis elegans via Transgenic Arrays Resulting in Diversity of Integrated Sequences (TARDIS)
Source: bioRxiv preprint, doi:10.1101/2022.10.30.514301, version 2 (2023-05-26)
Supplement: Supplementary file 3 [file 514301_file06.xlsx]

## Sheet: Sheet1
Primer Name	Sequence (5'->3')	Purpose
MS58	GCCCAGGAGAACACGTTAG	PX740 Sanger validation
MS59	GCTTATCTCGAATGAGACCCTTG	PX740 Sanger validation
MS249	CTTGGCACGTGGACGGGT	PX740 Sanger validation
MS260	ACGTCTACCACTGGCAAAC	PX740 Sanger validation
